# Supplementary material for: A microfluidic platform for integrated synthesis and dynamic light scattering measurement of block copolymer micelles
Source: Royal Society of Chemistry journal article supplement (doi:10.1039/b718235j), 2008-01-01
Supplement: b718235j.pdf [file b718235j.pdf]

---

*Supporting Information*

---

**A Microfluidic Platform for Integrated Synthesis and Dynamic Light  
Scattering Measurement of Block Copolymer Micelles**

Thomas Q. Chastek, Kazunori Iida,

Eric J. Amis, Michael J. Fasolka, and Kathryn L. Beers

*Polymers Division, National Institute of Standards and Technology, Gaithersburg, Maryland 20899*

---

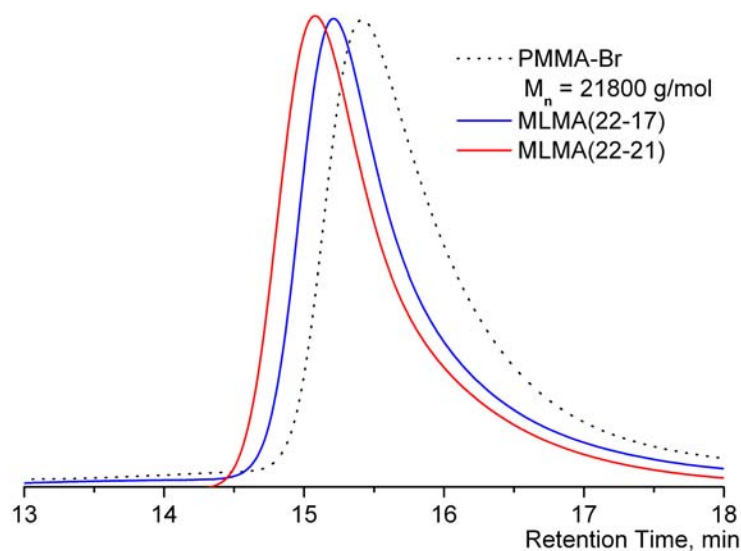

**Figure S1.** GPC traces of a PMMA-Br macroinitiator and PMMA-*b*-PLMA diblock copolymers obtained by microfluidic polymerization (data shown in Table 1).
